# Supplementary figures and images for: Oxytocin signaling in the medial amygdala is required for sex discrimination of social cues
Source: eLife journal article supplement (doi:10.7554/elife.31373), 2017-12-12

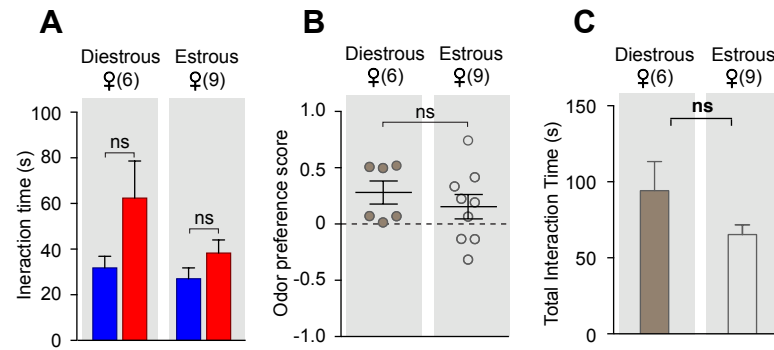

Supplement: supp [file elife_poa_e31373_Figure_1_figure_supplement_1.pdf › elife_poa_e31373_Figure_1_figure_supplement_1.pdf]

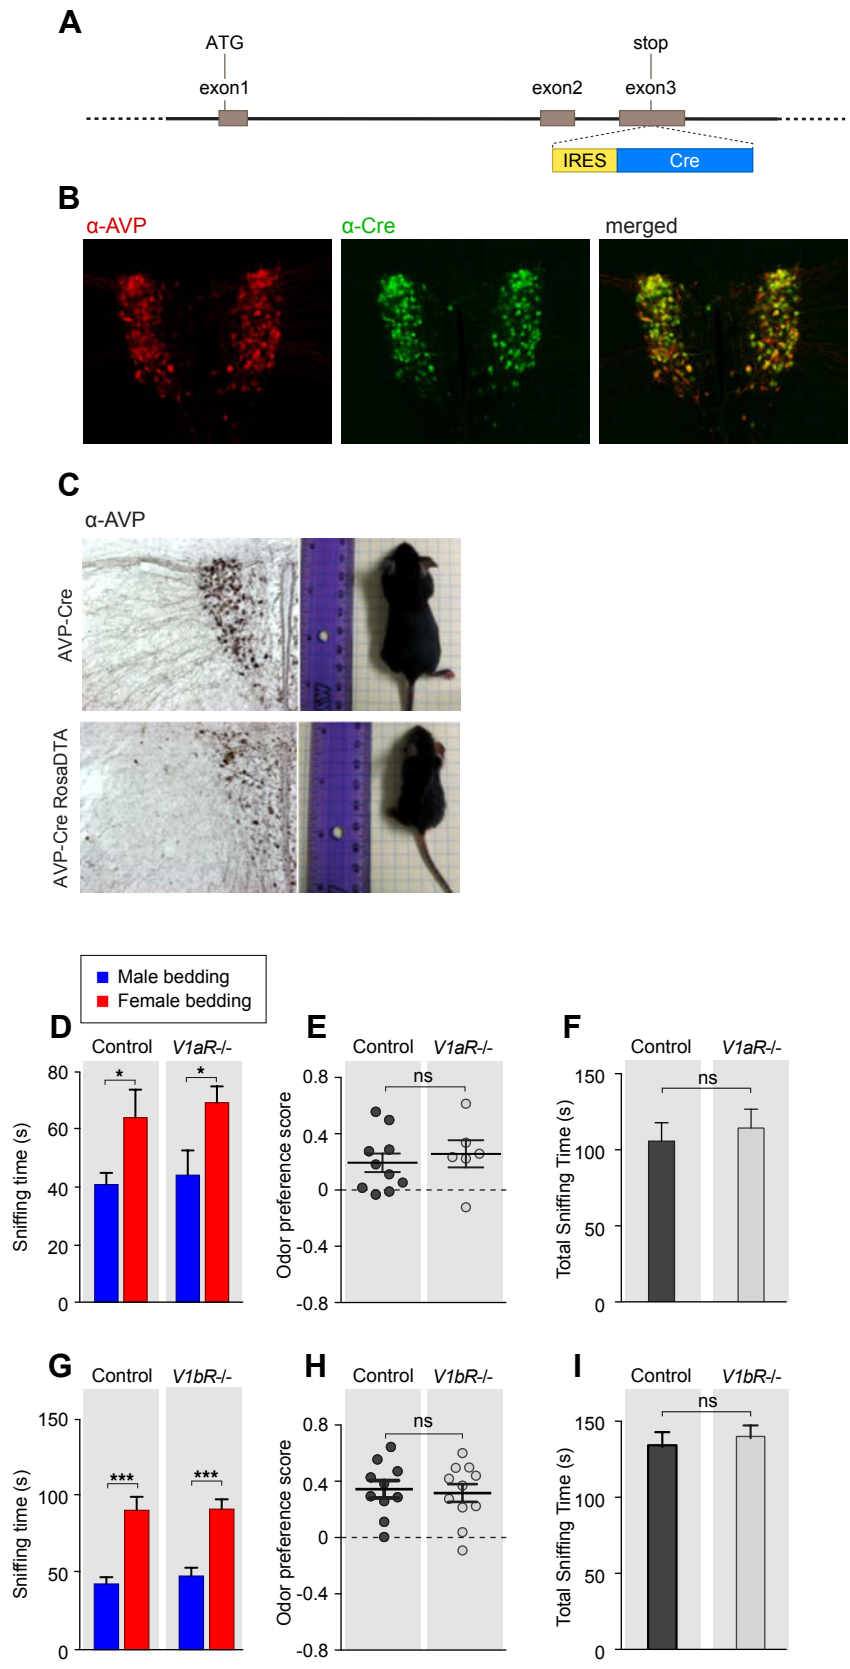

Supplement: supp [file elife_poa_e31373_Figure_2_figure_supplement_1.pdf › elife_poa_e31373_Figure_2_figure_supplement_1.pdf]

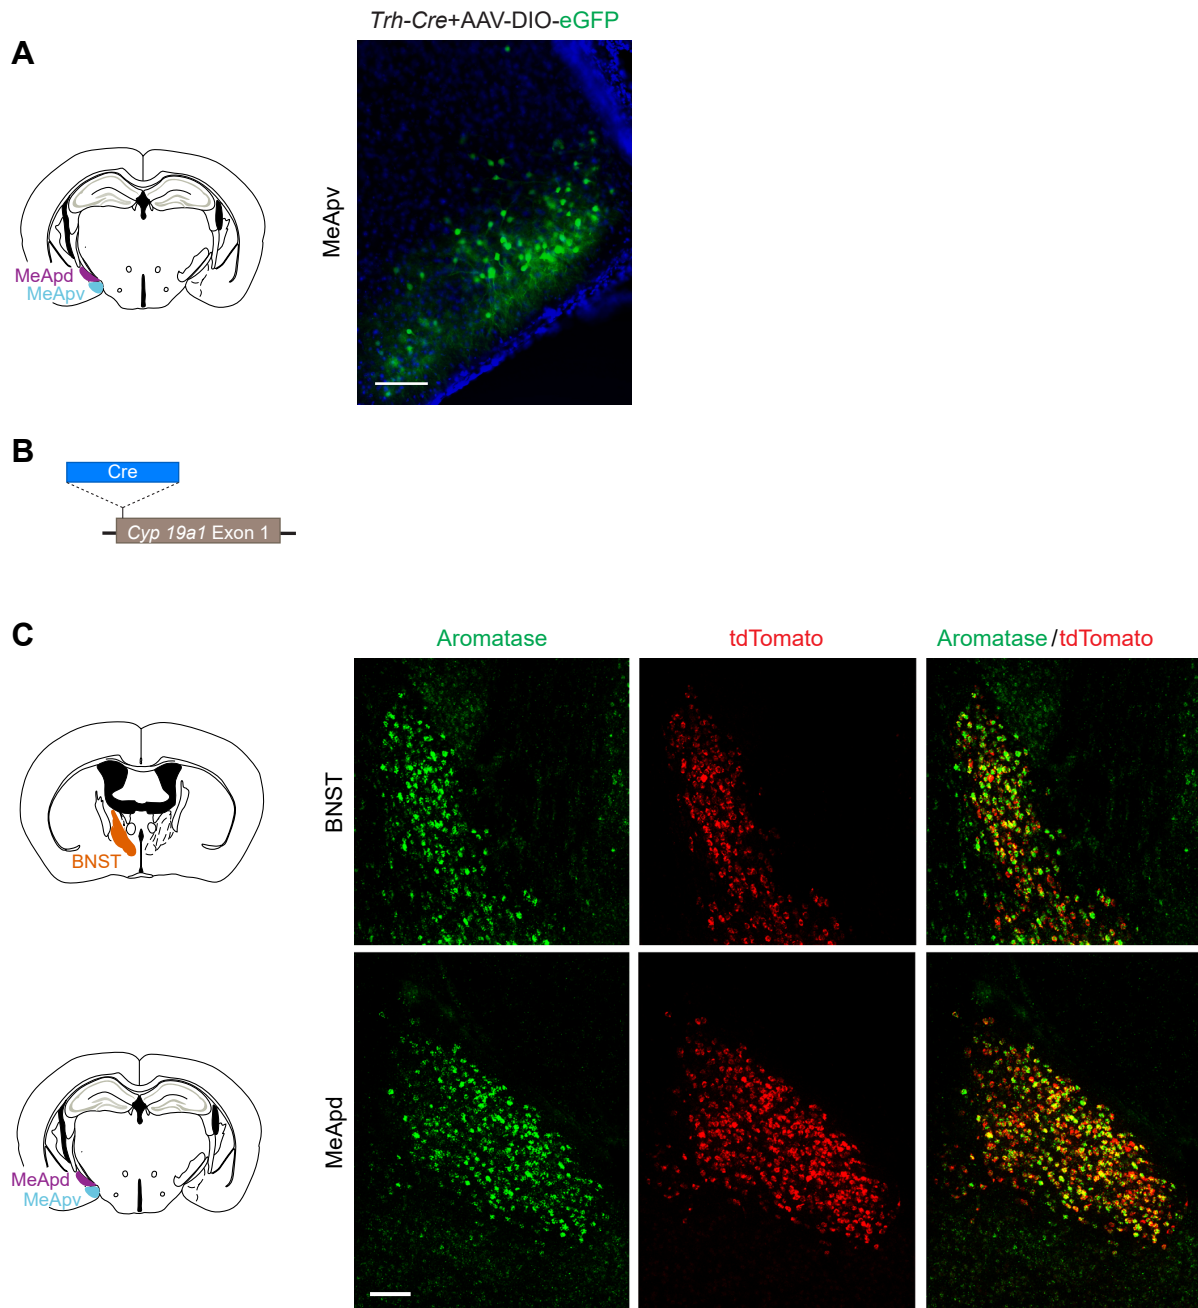

Supplement: supp [file elife_poa_e31373_Figure_2_figure_supplement_2.pdf › elife_poa_e31373_Figure_2_figure_supplement_2.pdf]

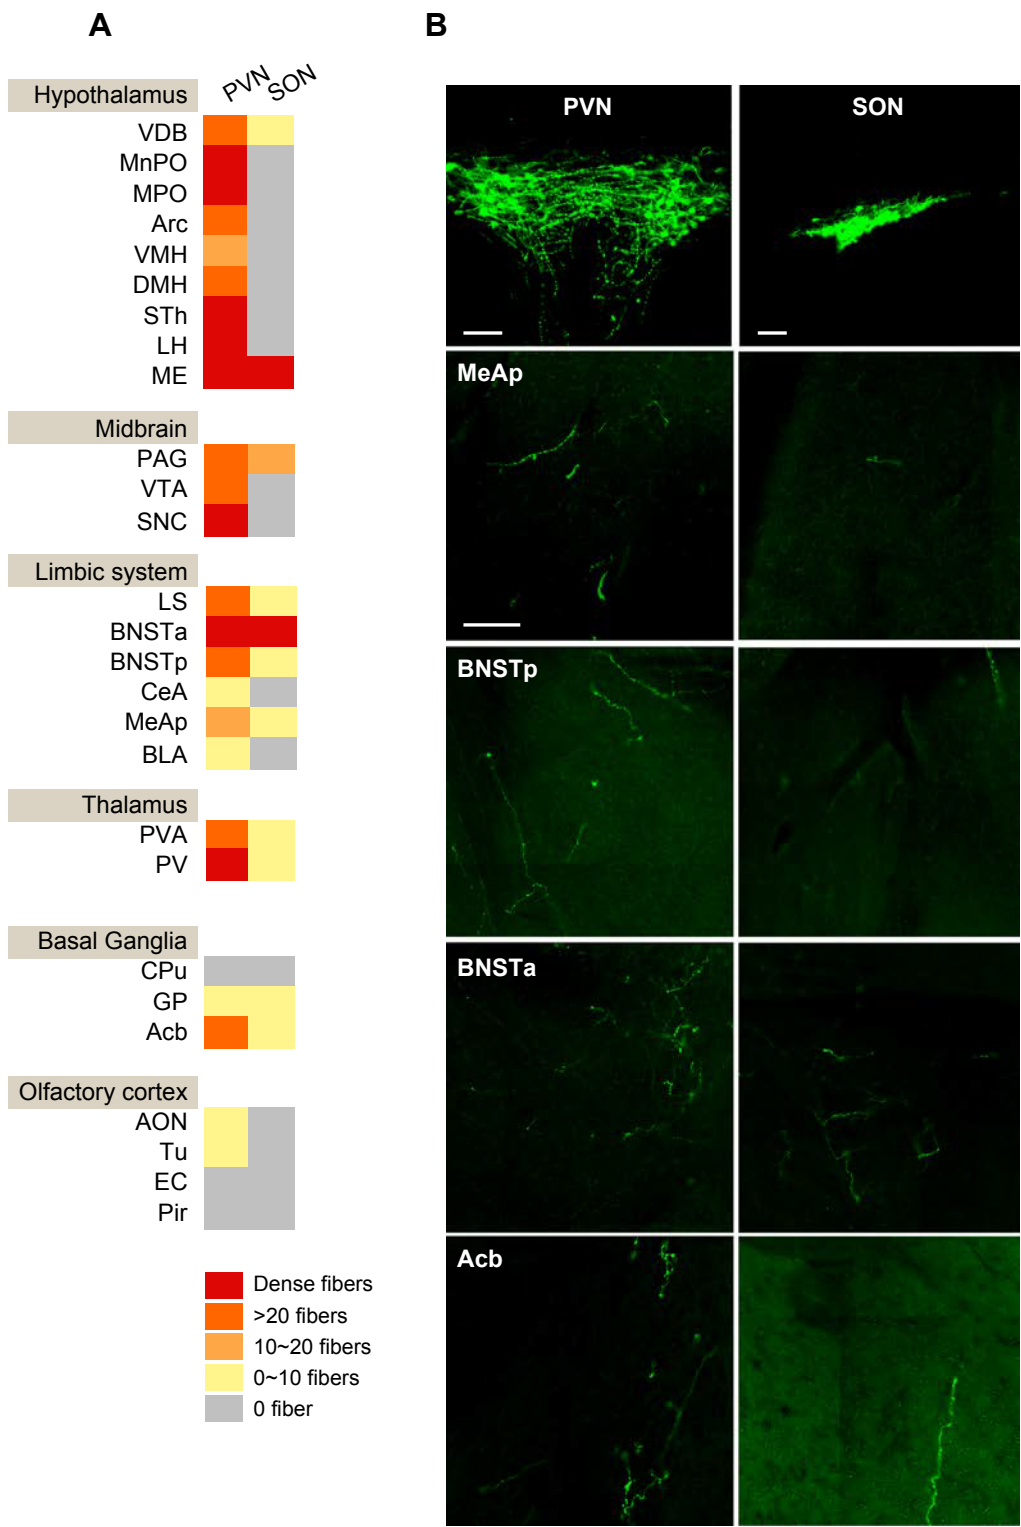

Supplement: supp [file elife_poa_e31373_Figure_5_figure_supplement_1.pdf › elife_poa_e31373_Figure_5_figure_supplement_1.pdf]

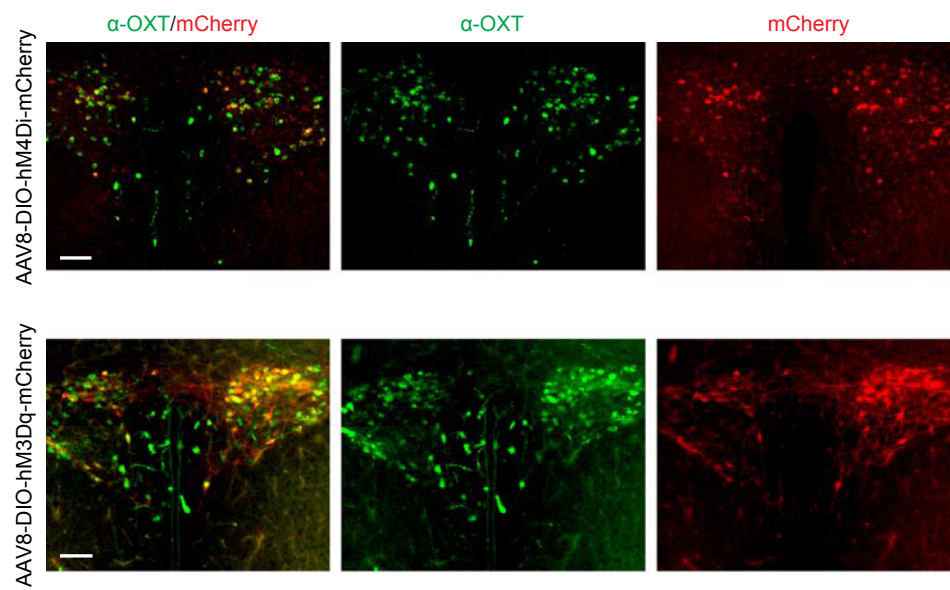

Supplement: supp [file elife_poa_e31373_Figure_6_figure_supplement_1.pdf › elife_poa_e31373_Figure_6_figure_supplement_1.pdf]

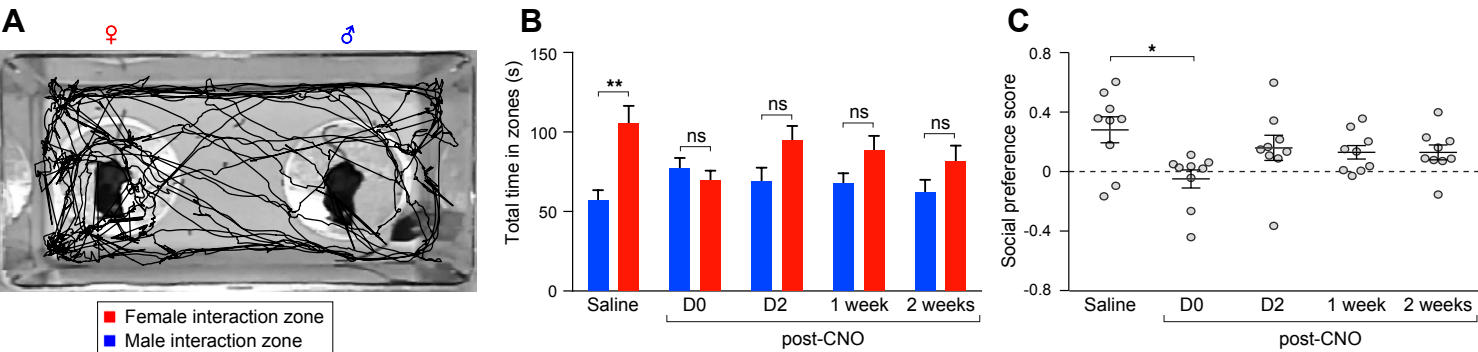

Supplement: supp [file elife_poa_e31373_Figure_7_figure_supplement_1.pdf › elife_poa_e31373_Figure_7_figure_supplement_1.pdf]
